# Supplementary material
Source: PubMed Central journal article supplement (PMC1821417)
Supplement: bjpg56-27FigureS1-2.pdf [file bjpg56-27FigureS1-2.pdf]

**Supplementary Figure 1. Difference against mean for pain scores in patient-GP pairs.**

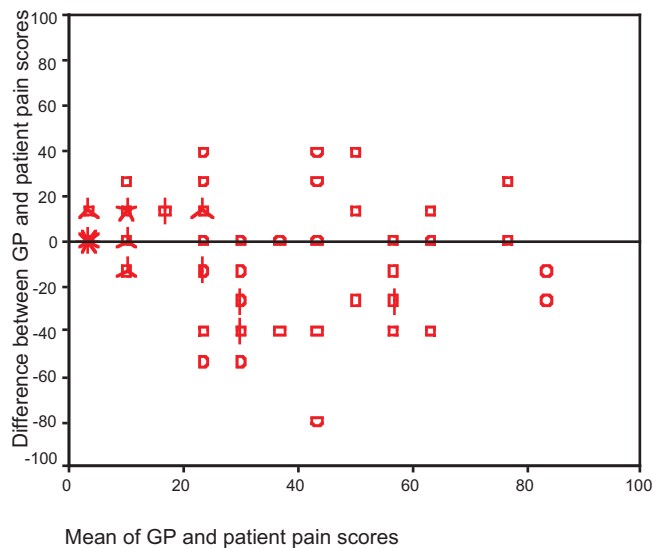

*Figure 1 illustrates pain scores in patient-GP pairs where there is good agreement between raters.*

**Supplementary Figure 2. Difference against mean for anxiety scores in patient-GP pairs.**

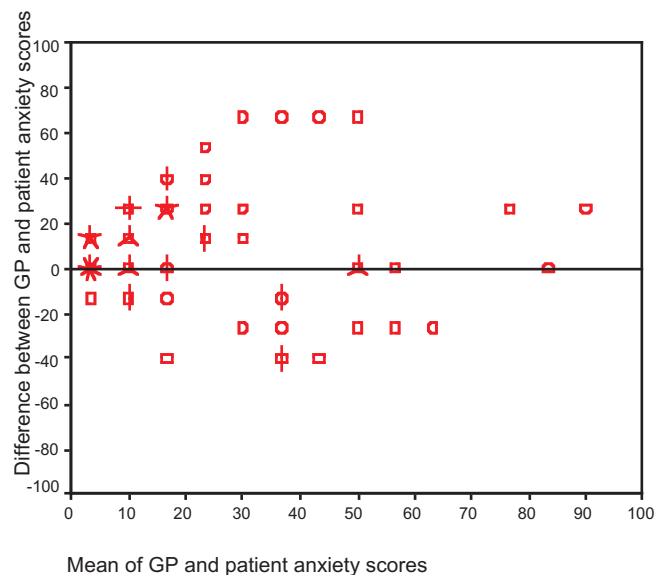

*Figure 2 shows scores for anxiety where there is less agreement, with GPs tending to overestimate.*
